# Supplementary material for: Understanding the efficiency of ionic liquids–DMSO as solvents for carbohydrates: use of solvatochromic- and related physicochemical properties
Source: Royal Society of Chemistry journal article supplement (doi:10.1039/d0nj02258f), 2020-01-01
Supplement: d0nj02258f1.pdf [file d0nj02258f1.pdf]

[1]

ESI for

## Understanding the efficiency of ionic liquids-DMSO as solvents for carbohydrates: Use of solvatochromic- and related physicochemical properties

Thaís A. Bioni, Mayara L. de Oliveira, Marcella T. Dignani, and Omar A. El Seoud,\*  
Institute of Chemistry, the University of São Paulo, 748 Prof. Lineu Prestes Av., 05508-000 São Paulo, SP, Brazil. Email (elseoud.usp@gmail.com)

**Table ESI-1.** <sup>1</sup>H NMR spectral data for the synthesized ionic liquids.<sup>a</sup>

| Cation                                                                                           | Cation hydrogen number (number of hydrogens; $\delta$ ppm; peak multiplicity) <sup>b</sup>                                                 |
|--------------------------------------------------------------------------------------------------|--------------------------------------------------------------------------------------------------------------------------------------------|
| 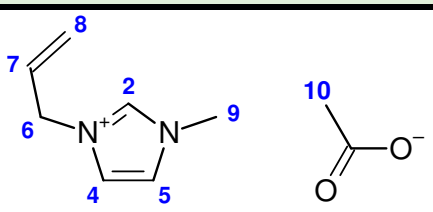<br>AlMelmAc   | H2 (1H; 10,7; s), H4/5 (2H; 7,6-7,9; dd), H6 (2H; 4,94; d), H7 (1H; 5,94; m), H8 (2H; 5,25-5,39; dd), H9 (3H; 3,99; s), H10 (3H, 1,92; s). |
| <br>AlMelmBz  | H2 (1H; 10,8; s), H4/5 (2H; 7,93; dd), H6 (2H; 4,64; d), H7 (1H; 5,76; m), H8 (2H; 5,12-5,26; dd), H9 (3H; 3,73; s), H10 (5H, 7,3-7,9; m). |
| <br>AlMelmCl  | H2 (1H; 10,4; s), H4/5 (2H; 7,7-7,9; dd), H6 (2H; 5,02; d), H7 (1H; 5,98; m), H8 (2H; 5,31-5,40; dd), H9 (3H; 4,06; s).                    |
| <br>AlMelmFor | H2 (1H; 10,7; s), H4/5 (2H; 7,6-7,8; dd), H6 (2H; 4,89; d), H7 (1H; 5,96; m), H8 (2H; 5,29-5,39; dd), H9 (3H; 3,95; s), H10 (1H, 8,95; s). |

Table ESI-1, continue

| Cation                                                                                                                                                          | Hydrogen Number (Number of hydrogens; $\delta$ ppm; peak multiplicity) <sup>b</sup>                                                                                  |
|-----------------------------------------------------------------------------------------------------------------------------------------------------------------|----------------------------------------------------------------------------------------------------------------------------------------------------------------------|
| 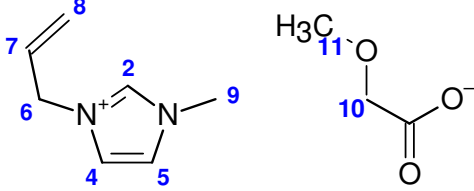 <p style="text-align: center;"><b>AlMeImMeOAc</b></p>                         | <p>H2 (1H; 10,35; s), H4/5 (2H; 7,7-7,9; dd), H6 (2H; 4,89; d), H7 (1H; 5,96; m), H8 (2H; 5,29-5,39; dd), H9 (3H; 3,95; s), H10 (3H; 2,65; s).</p>                   |
|  <p style="text-align: center;"><b>AlMeImPr</b></p>                            | <p>H2 (1H; 11,15; s), H4/5 (2H; 7,7-7,9; dd), H6 (2H; 4,89; d), H7 (1H; 5,96; m), H8 (2H; 5,29-5,39; dd), H9 (3H; 3,95; s), H10 (2H; 4,05; s), H11(3H, 2,45; s).</p> |
|  <p style="text-align: center;"><b>AlMe<sub>2</sub>ImAc</b></p>               | <p>H4/5 (2H; 7,87; d), H6 (2H; 4,94; d), H7 (1H; 5,94; m), H8 (2H; 5,25-5,39; dd), H9 (3H; 3,99; s), H10 (3H; 2,74; s), H11 (3H, 1,96; s).</p>                       |
|  <p style="text-align: center;"><b>AlMe<sub>2</sub>ImBz</b></p>              | <p>H4/5 (2H; 7,6-7,9; dd), H6 (2H; 4,64; d), H7 (1H; 5,76; m), H8 (2H; 5,12-5,26; dd), H9 (3H; 3,73; s), H10 (3H; 2,48; s), H11 (5H, 7,3-7,9; m).</p>                |
|  <p style="text-align: center;"><b>AlMe<sub>2</sub>ImCl</b></p>              | <p>H4/5 (2H; 7,6-7,9; dd), H6 (2H; 5,02; d), H7 (1H; 5,98; m), H8 (2H; 5,31-5,40; dd), H9 (3H; 4,06; s), H10 (3H; 2,83; s).</p>                                      |
|  <p style="text-align: center;"><b>AlMe<sub>2</sub>ImMe<sub>2</sub>P</b></p> | <p>H4/5 (2H; 7,6-7,9; dd), H6 (2H; 4,93; d), H7 (1H; 5,95; m), H8 (2H; 5,25-5,38; dd), H9 (3H; 3,98; s), H10 (3H; 2,73; s), H11 (6H, 3,53; s).</p>                   |

Table ESI-1, continue

| Cation                                                                                                                                              | Hydrogen Number (Number of hydrogens; $\delta$ ppm; peak multiplicity) <sup>b</sup>                                                                                                      |
|-----------------------------------------------------------------------------------------------------------------------------------------------------|------------------------------------------------------------------------------------------------------------------------------------------------------------------------------------------|
| 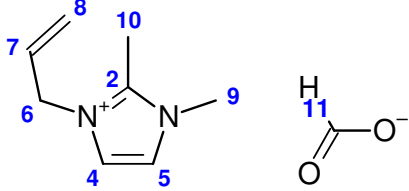 <p style="text-align: center;"><b>AlMe<sub>2</sub>ImFor</b></p>   | <p>H4/5 (2H; 7,5-7,8; dd), H6 (2H; 4,89; d),<br/> H7 (1H; 5,96; m), H8 (2H; 5,29-5,39;<br/> dd), H9 (3H; 3,95; s), H10 (3H; 2,72; s),<br/> H11 (1H; 8,7; s).</p>                         |
|  <p style="text-align: center;"><b>AlMe<sub>2</sub>ImMeOAc</b></p> | <p>H4/5 (2H; 7,6-7,9; dd), H6 (2H; 4,89; d),<br/> H7 (1H; 5,96; m), H8 (2H; 5,29-5,39;<br/> dd), H9 (3H; 3,95; s), H10 (3H; 2,72; s),<br/> H11 (2H; 4,05; s), H12 (3H; 2,35; s).</p>     |
|  <p style="text-align: center;"><b>AlMe<sub>2</sub>ImPr</b></p>   | <p>H4/5 (2H; 7,6-7,8; dd), H6 (2H; 4,89; d),<br/> H7 (1H; 5,96; m), H8 (2H; 5,29-5,39;<br/> dd), H9 (3H; 3,95; s), H10 (3H; 2,72; s),<br/> H11 (2H; 2,05; qua). H12 (3H; 0,95; tri).</p> |
|  <p style="text-align: center;"><b>DBUHAc</b></p>                | <p>H1 (1H; 11,97; s), H2/4/6 (6H; 3,49; m),<br/> H3 (2H; 2,81; m), H7/8/9 (6H; 1,75; m),<br/> H10/11 (5H; 2,02; s).</p>                                                                  |
|  <p style="text-align: center;"><b>DBUHFor</b></p>               | <p>H1/11 (2H; 11,97; s), H2/4/6 (6H; 3,49;<br/> m), H3 (2H; 2,81; m), H7/8/9 (6H; 1,75;<br/> m), H10 (2H; 2,01; tri).</p>                                                                |
|                                                                  | <p>H1 (1H; 11,97; s), H2/4/6/12 (9H; 3,49;<br/> m), H3 (2H; 2,92; m), H7/8/9 (6H; 1,75;<br/> m), H10 (2H; 2,02; tri), H11 (2H; 3,90,<br/> s).</p>                                        |

| DBUHMeOAc                                                                                                                          |                                                                                                                                                 |
|------------------------------------------------------------------------------------------------------------------------------------|-------------------------------------------------------------------------------------------------------------------------------------------------|
| <b>Table ESI-1, continue</b>                                                                                                       |                                                                                                                                                 |
| Cation                                                                                                                             | Hydrogen Number (Number of hydrogens; $\delta$ ppm; peak multiplicity) <sup>b</sup>                                                             |
| 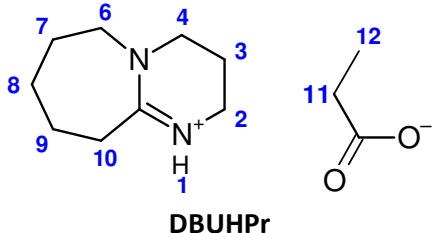 <p style="text-align: center;"><b>DBUHPr</b></p> | H1 (1H; 11,97; s), H2/4/6 (6H; 3,49; m), H3 (2H; 2,81; m), H7/8/9 (6H; 1,75; m), H10 (2H; 2,02; qui), H11 (2H; 2,25; qua), H12 (3H; 1,13; tri). |
|  <p style="text-align: center;"><b>TGMHAc</b></p> | H1 (12H; 2,99; s), H2 (2H; 7,82; s), H3 (3H; 1,97; s).                                                                                          |
|                                                  | H4/5 (2H; 7,6-7,9; dd), H6 (2H; 4,94; d), H7 (1H; 5,94; m), H8 (2H; 5,2-5,4; dd), H10 (3H; 2,84, s).                                            |

a-At 300 MHz. Values of  $\delta$  are in ppm from internal TMS.

b-The abbreviations for peak splitting are: s: singlet; d: doublet; dd: doublet of doublets; tri: triplet; qua: quartet; qui: quintet; m: multiplet.

**Table ESI-2:** Molar volume data calculated from the molar mass and density of LIs, and molar volume calculated by the Molinspiration software.

| Ionic liquid                         | Molar mass /<br>g.mol <sup>-1</sup> | Density <sup>1,2</sup> /<br>g.cm <sup>-3</sup> | Molar volume <sup>a</sup><br>cm <sup>3</sup> .mol <sup>-1</sup> | Molar volume <sup>3,b</sup><br>cm <sup>3</sup> .mol <sup>-1</sup> |
|--------------------------------------|-------------------------------------|------------------------------------------------|-----------------------------------------------------------------|-------------------------------------------------------------------|
| BuMelmAc                             | 198.26                              | 1.0532                                         | 188.25                                                          | 205.46                                                            |
| BuMelmCl                             | 174.67                              | 1.086                                          | 160.84                                                          | 176.25                                                            |
| EtMelmCl                             | 146.62                              | 1.1362                                         | 129.04                                                          | 142.65                                                            |
| PrMelmCl                             | 160.64                              | 1.1014                                         | 145.85                                                          | 159.45                                                            |
| C <sub>5</sub> O <sub>2</sub> MelmCl | 192.64                              | 1.14                                           | 168.98                                                          | 177.42                                                            |
| OcMelmCl                             | 230.78                              | 1.0104                                         | 228.40                                                          | 243.46                                                            |
| Me <sub>2</sub> ImDMP                | 222.18                              | 1.277                                          | 173.99                                                          | 198.96                                                            |
| EtMelmAc                             | 170.21                              | 1.027                                          | 165.74                                                          | 171.86                                                            |
| EtMelmDEP                            | 264.26                              | 1.1572                                         | 228.36                                                          | 249.36                                                            |
| EtMelmDMP                            | 236.21                              | 1.1572                                         | 204.12                                                          | 215.76                                                            |
| HxMelmCl                             | 202.72                              | 1.03                                           | 196.82                                                          | 209.86                                                            |
| EtMelmMS                             | 206.26                              | 1.247                                          | 165.41                                                          | 184.31                                                            |
| EtMelmDBP                            | 320.36                              | 1.075                                          | 298.01                                                          | 316.57                                                            |
| AlMelmCl                             | 158.63                              | 1.1408                                         | 154.01                                                          | 153.82                                                            |
| BuEtImTAc                            | 266.26                              | 1.183                                          | 225.07                                                          | 234.71                                                            |
| Bu <sub>2</sub> ImCl                 | 216.75                              | 1.0082                                         | 214.99                                                          | 226.66                                                            |

a - Molar volume calculated through the molar mass divided by the density of the IL.

Density data from:

b - Acronyms for the ionic liquids.

BuMelmAc: 1-Butyl-3-methylimidazolium acetate; BuMelmCl: 1-Butyl-3-methylimidazolium chloride; EtMelmCl: 1-ethyl-3-methylimidazolium chloride; PrMelmCl: 1-propyl-3-methylimidazolium chloride; C<sub>5</sub>O<sub>2</sub>MelmCl: 1- (3,6-dioxa) - (1-heptyl) - 3-methylimidazolium chloride; OcMelmCl: 1-Octyl-3-methylimidazolium chloride; Me<sub>2</sub>ImDMP: 1,3-dimethylimidazolium dimethylphosphate; EtMelmAc: 1-

[6]

ethyl-3-methylimidazolium acetate; EtMeImDEP: 1-ethyl-3-methylimidazolium diethylphosphate; EtMeImDMP: 1-ethyl-3-methylimidazolium dimethyl phosphate; HxMeImCl: 1-hexyl-3-methylimidazolium chloride; EtMeImMS: 1-ethyl-3-methylimidazolium methyl sulfonate; EtMeImDBP: 1-ethyl-3-methylimidazolium dibutylphosphate; AlMeImCl: 1-allyl-3-methylimidazolium chloride; BuEtImTAc: 1-Butyl-3-ethylimidazolium trifluoroacetate; Bu<sub>2</sub>ImCl: 1,3-dibutylimidazolium chloride.



**Table ESI-3.** Values of the empirical polarity ( $E_T(\text{MePMBR}_2)$ ,  $E_T(\text{WB})$ ,  $E_T(\text{RB})$ ), Lewis acidity ( $SA$ ), Lewis basicity ( $SB$ ), dipolarity ( $SD$ ), polarizability ( $SP$ ), molar volume ( $V_M$ ), refractive index ( $n$ ) and Lorentz-Lorenz refractive index function  $f(n)$  employed in the correlations of part II of **Table 3**, molecular solvents, see text.<sup>a</sup>

| Solvent             | $E_T(\text{MePMBR}_2)^b$ ,<br>/ kcal.mol <sup>-1</sup> | $E_T(\text{RB})^b$ , <sup>b,5</sup> /<br>kcal.mol <sup>-1</sup> | $E_T(\text{WB})^b$ , <sup>b,6</sup><br>/ kcal.mol <sup>-1</sup> | $Sb$ , <sup>b,7</sup> | $SB$ , <sup>b,8</sup> | $SD$ , <sup>b,9</sup> | $SP$ , <sup>b,10</sup> | $V_M$ /<br>cm <sup>3</sup> .mol <sup>-1</sup> | $n$    | $f(n)$  |
|---------------------|--------------------------------------------------------|-----------------------------------------------------------------|-----------------------------------------------------------------|-----------------------|-----------------------|-----------------------|------------------------|-----------------------------------------------|--------|---------|
| Methanol            | 58.56                                                  | 55.4                                                            | 64.6                                                            | 0.61                  | 0.55                  | 0.964                 | 0.590                  | 40.45                                         | 1.3314 | 0.20480 |
| Ethanol             | 56.03                                                  | 51.9                                                            | 60.7                                                            | 0.40                  | 0.66                  | 0.810                 | 0.624                  | 58.38                                         | 1.3611 | 0.22130 |
| 1-Pronanol          | 54.8                                                   | 50.7                                                            | 58.7                                                            | 0.37                  | 0.78                  | 0.777                 | 0.647                  | 74.84                                         | 1.3870 | 0.23543 |
| 1-Butanol           | 54.15                                                  | 49.7                                                            | 57.7                                                            | 0.34                  | 0.81                  | 0.682                 | 0.662                  | 91.51                                         | 1.3993 | 0.24205 |
| 1-Hexanol           | 53.07                                                  | 48.8                                                            | 57.06                                                           | 0.32                  | 0.88                  | 0.567                 | 0.688                  | 124.61                                        | 1.4178 | 0.25190 |
| 1-Octanol           | 52.26                                                  | 48.1                                                            | 56.1                                                            | 0.30                  | 0.92                  | 0.473                 | 0.699                  | 156.90                                        | 1.429  | 0.25780 |
| 2-Propanol          | 53.54                                                  | 48.4                                                            | 57.06                                                           | 0.28                  | 0.83                  | 0.853                 | 0.619                  | 76.46                                         | 1.3776 | 0.23033 |
| Butan-2-ol          | 52.29                                                  | 47.1                                                            | 55.73                                                           | 0.22                  | 0.89                  | 0.728                 | 0.647                  | 91.74                                         | 1.3978 | 0.24124 |
| 2-Methyl-2-propanol | 50.59                                                  | 43.3                                                            | 51.85                                                           | 0.15                  | 0.93                  | 0.732                 | 0.632                  | 95.64                                         | 1.3870 | 0.23543 |
| Benzyl alcohol      | 54.56                                                  | 50.4                                                            | 58.8                                                            | 0.41                  | 0.46                  | 0.808                 | 0.855                  | 103.58                                        | 1.5396 | 0.31356 |
| Chloroform          | 46.12                                                  | 39.1                                                            | 48.6                                                            | 0.05                  | 0.07                  | 0.640                 | 0.773                  | 80.17                                         | 1.4590 | 0.27338 |
| Dichloromethane     | 48.13                                                  | 40.7                                                            | 49.7                                                            | 0.04                  | 0.18                  | 0.791                 | 0.754                  | 64.02                                         | 1.4244 | 0.25538 |
| 1,2-Dichloroethane  | 48.55                                                  | 41.3                                                            | 51.1                                                            | 0.03                  | 0.13                  | 0.738                 | 0.771                  | 78.97                                         | 1.4448 | 0.26605 |
| Chlorobenzene       | 46.36                                                  | 36.8                                                            | 44.3                                                            | 0                     | 0.18                  | 0.564                 | 0.819                  | 104.41                                        | 1.5241 | 0.30602 |
| Acetone             | 51.06                                                  | 42.2                                                            | 52.0                                                            | 0                     | 0.48                  | 0.907                 | 0.652                  | 74.03                                         | 1.3588 | 0.22004 |
| Acetonitrile        | 53.19                                                  | 45.6                                                            | 55.4                                                            | 0.04                  | 0.29                  | 1.023                 | 0.632                  | 52.23                                         | 1.3440 | 0.21184 |
| DMAc                | 51.98                                                  | 42.9                                                            | 51.5                                                            | 0.03                  | 0.65                  | 0.994                 | 0.765                  | 92.98                                         | 1.4375 | 0.26225 |
| DMF                 | 52.39                                                  | 43.2                                                            | 53.3                                                            | 0.03                  | 0.61                  | 0.978                 | 0.762                  | 77.10                                         | 1.4305 | 0.25859 |
| DMSO                | 53.38                                                  | 45.1                                                            | 55.1                                                            | 0.07                  | 0.65                  | 1.000                 | 0.834                  | 71.03                                         | 1.4790 | 0.28357 |
| 1,4-Dioxane         | 45.69                                                  | 36.0                                                            | 44.0                                                            | 0                     | 0.44                  | 0.303                 | 0.730                  | 85.29                                         | 1.4203 | 0.25322 |



Table ESI-3, continue.

| Solvent       | $E_T(\text{MePMBR}_2)^a$<br>/ kcal.mol <sup>-1</sup> | $E_T(\text{RB})$ /<br>kcal.mol <sup>-1</sup> | $E_T(\text{WB})$ /<br>kcal.mol <sup>-1</sup> | SA   | SB   | SD    | SP    | $V_M$ /<br>cm <sup>3</sup> .mol <sup>-1</sup> | n      | f(n)    |
|---------------|------------------------------------------------------|----------------------------------------------|----------------------------------------------|------|------|-------|-------|-----------------------------------------------|--------|---------|
| Ethyl acetate | 47.22                                                | 38.1                                         | 47.6                                         | 0    | 0.54 | 0.617 | 0.647 | 97.68                                         | 1.3720 | 0.22728 |
| Pyridine      | 49.66                                                | 40.5                                         | 48.99                                        | 0.03 | 0.58 | 0.761 | 0.842 | 80.56                                         | 1.5093 | 0.29874 |
| THF           | 47.69                                                | 37.4                                         | 44.7                                         | 0    | 0.59 | 0.645 | 0.707 | 81.24                                         | 1.4073 | 0.24632 |

a- All data are for 25 °C. We calculated all solvent descriptors using the equations listed in **Table 2** of text.

b- We use (b plus a number) to denote the reference number in ESI where these data were taken from.

**Table ESI-4:**  $\lambda_{\max}$  values of the probes used to determine the solvatochromic parameters.

| LI                                    | $E_T(\text{WB})$       | SA                     | SB                      |                        | SD and SP                 |                               |
|---------------------------------------|------------------------|------------------------|-------------------------|------------------------|---------------------------|-------------------------------|
|                                       | $\lambda_{\max}$<br>WB | $\lambda_{\max}$<br>Fe | $\lambda_{\max}$<br>MNI | $\lambda_{\max}$<br>NI | $\lambda_{\max}$<br>DMANF | $\lambda_{\max}$<br>antraceno |
| AlMeImAc                              | 495.4                  | 594.5                  | 452.9                   | 452.1                  | 446.7                     | 380.7                         |
| AlMeImBz                              | 501.9                  | 594.3                  | 428.4                   | 432.1                  | 452.0                     | 382.0                         |
| AlMeImCl                              | 489.7                  | 592.7                  | 426.6                   | 432.6                  | 444.6                     | 380.2                         |
| AlMeImFor                             | 495.5                  | 594.2                  | 445.4                   | 451.2                  | 447.8                     | 381.0                         |
| AlMeImMeOAc                           | 498.1                  | 594.0                  | 427.6                   | 433.5                  | 446.5                     | 380.7                         |
| AlMeImPr                              | 501.3                  | 594.6                  | 427.7                   | 426.8                  | 447.3                     | 380.9                         |
| AlMe <sub>2</sub> ImAc                | 509.8                  | 597.2                  | 451.2                   | 449.3                  | 447.5                     | 380.9                         |
| AlMe <sub>2</sub> ImBz                | 517.6                  | 597.0                  | 448.6                   | 452.3                  | 453.8                     | 382.4                         |
| AlMe <sub>2</sub> ImCl                | 506.9                  | 595.1                  | 442.7                   | 449.3                  | 445.1                     | 380.3                         |
| AlMe <sub>2</sub> ImMe <sub>2</sub> P | 513.31                 | 595.6                  | 442.1                   | 446.9                  | 443.4                     | 379.9                         |
| AlMe <sub>2</sub> ImFor               | 503.6                  | 595.4                  | 437.7                   | 433.9                  | 446.2                     | 380.6                         |
| AlMe <sub>2</sub> ImMAc               | 508.3                  | 595.2                  | 436.0                   | 441.4                  | 446.6                     | 380.7                         |
| AlMe <sub>2</sub> ImPr                | 513.0                  | 597.3                  | 436.4                   | 434.4                  | 448.4                     | 381.1                         |
| DBUAc                                 | 485.34                 | 608.3                  | 427.8                   | 428.3                  | 442.7                     | 379.8                         |
| DBUFor                                | 490.67                 | 608.1                  | 426.7                   | 429.2                  | 442.7                     | 379.8                         |
| DBUMAc                                | 492.36                 | 607.9                  | 429.0                   | 430.0                  | 443.7                     | 380.0                         |
| DBUPr                                 | 490.17                 | 608.7                  | 435.9                   | 435.9                  | 449.8                     | 381.5                         |
| TMGAc                                 | 493.3                  | 593.4                  | 423.5                   | 426.3                  | 440.7                     | 379.3                         |

**Table ESI-5.** Dipolarity ( $SD$ ), dielectric constant ( $\epsilon$ ) and molar volume ( $V_M$ ) for molecular solvents.

| Solvent               | $\epsilon^{11}$ | $SD^9$ | $V_M^*$ |
|-----------------------|-----------------|--------|---------|
| Acetone               | 0.907           | 21.01  | 74.08   |
| Bromobenzene          | 0.497           | 5.45   | 104.67  |
| Butyl acetate         | 0.535           | 5.07   | 131.7   |
| Butylamine            | 0.296           | 4.71   | 98.84   |
| Chlorobenzene         | 0.537           | 5.69   | 101.41  |
| Dibutylether          | 0.175           | 3.083  | 169.13  |
| Dibenzyl ether        | 0.509           | 3.821  | 190.09  |
| Trichloromethane      | 0.614           | 4.807  | 80.12   |
| Pentane               | 0               | 1.837  | 115.26  |
| 1-Methylnaphthalene   | 0.51            | 2.915  | 142.2   |
| Acetonitrile          | 0.974           | 36.64  | 52.23   |
| Allyl alcohol         | 0,839           | 20.7   | 68.01   |
| Methanol              | 0.904           | 33.0   | 40.45   |
| 1,2-Dichloroethane    | 0.742           | 10.42  | 79.17   |
| Ethylbenzene          | 0.237           | 2.446  | 122.6   |
| Ethylacetate          | 0.603           | 6.081  | 97.68   |
| 3-Methylpentane       | 0               | 1.886  | 129.79  |
| Methylcyclohexane     | 0               | 2.024  | 127.51  |
| 1,1,1-Trichloroethane | 0.5             | 7.243  | 101.06  |
| Propylbenzene         | 0.209           | 2.37   | 139.44  |
| Acetonitrile          | 0.974           | 36.64  | 52.23   |
| Fluorobenzene         | 0.511           | 5.465  | 93.94   |
| Nitromethane          | 0.954           | 37.27  | 53.54   |
| Benzene               | 0.27            | 2.283  | 89.16   |

\* Molar volume calculated through the molar mass divided by the density of solvents.

**Table ESI-6.** Dielectric constant ( $\epsilon$ ) and molar volume ( $V_M$ ) data<sup>12</sup> for ionic liquids.

| Ionic Liquid                         | $V_M / \text{nm}^3$ | $\epsilon$ |
|--------------------------------------|---------------------|------------|
| EtMeImPF <sub>6</sub>                | 0.265               | 14.7       |
| BuMeImPF <sub>6</sub>                | 0.305               | 14         |
| HxMeImPF <sub>6</sub>                | 0.351               | 11.1       |
| OcMeImPF <sub>6</sub>                | 0.397               | 9.7        |
| EtMeImTfN <sub>2</sub>               | 0.388               | 11.5       |
| PrMeImTfN <sub>2</sub>               | 0.41                | 10.6       |
| BuMeImTfN <sub>2</sub>               | 0.428               | 9.4        |
| PeMeImTfN <sub>2</sub>               | 0.451               | 7.9        |
| HxMeImTfN <sub>2</sub>               | 0.474               | 7          |
| OcMeImTfN <sub>2</sub>               | 0.52                | 6.5        |
| EtMeImTfO                            | 0.287               | 15.8       |
| BuMeImTfO                            | 0.327               | 13.5       |
| BuMeImCl                             | 0.243               | 15         |
| Me <sub>2</sub> ImMeOSO <sub>3</sub> | 0.27                | 17.2       |
| EtMeImMeOSO <sub>3</sub>             | 0.326               | -          |
| Bu <sub>3</sub> MePyBF <sub>4</sub>  | 0.293               | 15.3       |
| PrMePyrTfN <sub>2</sub>              | 0.431               | 9.1        |
| BuMePyrTfN <sub>2</sub>              | 0.453               | 7          |

EtMeImPF<sub>6</sub>: 1-ethyl-3-methylimidazolium hexafluorophosphate; BuMeImPF<sub>6</sub>: 1-butyl-3-methylimidazolium hexafluorophosphate; HxMeImPF<sub>6</sub>: 1-hexyl-3-methylimidazolium hexafluorophosphate; OcMeImPF<sub>6</sub>: 1-methyl-3-octylimidazolium hexafluorophosphate; EtMeImTfN<sub>2</sub>: 1-ethyl-3-methylimidazolium bis(trifluoromethylsulfonyl) imide; PrMeImTfN<sub>2</sub>: 1-propyl-3-methylimidazole bis(trifluoromethylsulfonyl) imide; BuMeImTfN<sub>2</sub>: 1-butyl-3-methylimidazole bis(trifluoromethylsulfonyl) imide; PeMeImTfN<sub>2</sub>: 1-methyl-3-pentylimidazole bis(trifluoromethylsulfonyl) imide; HxMeImTfN<sub>2</sub>: 1-hexyl-3-methylimidazole bis(trifluoromethylsulfonyl) imide; OcMeImTfN<sub>2</sub>: 1-ethyl-3-methylimidazole bis(trifluoromethylsulfonyl) imide; EtMeImTfO: 1-ethyl-3-methylimidazolium

trifluoromethylsulfonate; BuMeImTfO: 1-butyl-3-methylimidazolium  
trifluoromethylsulfonate; BuMeImCl: 1-butyl-3-methylimidazolium chloride;  
Me<sub>2</sub>ImMeOSO<sub>3</sub>: 1,3-dimethylimidazolium methyl sulfonate; EtMeImMeOSO<sub>3</sub>: 1-ethyl-  
3-methylimidazolium methyl sulfonate; Bu<sub>3</sub>MePyBF<sub>4</sub>: 1-butyl-3-methylpyridinium  
tetrafluoroborate; PrMePyrTfN<sub>2</sub>: 1-propyl-1-methylpyrrolidinium bis  
(trifluoromethylsulfonyl) imide; BuMePyrTfN<sub>2</sub>: 1-butyl-1-methylpyrrolidinium bis  
(trifluoromethylsulfonyl) imide.

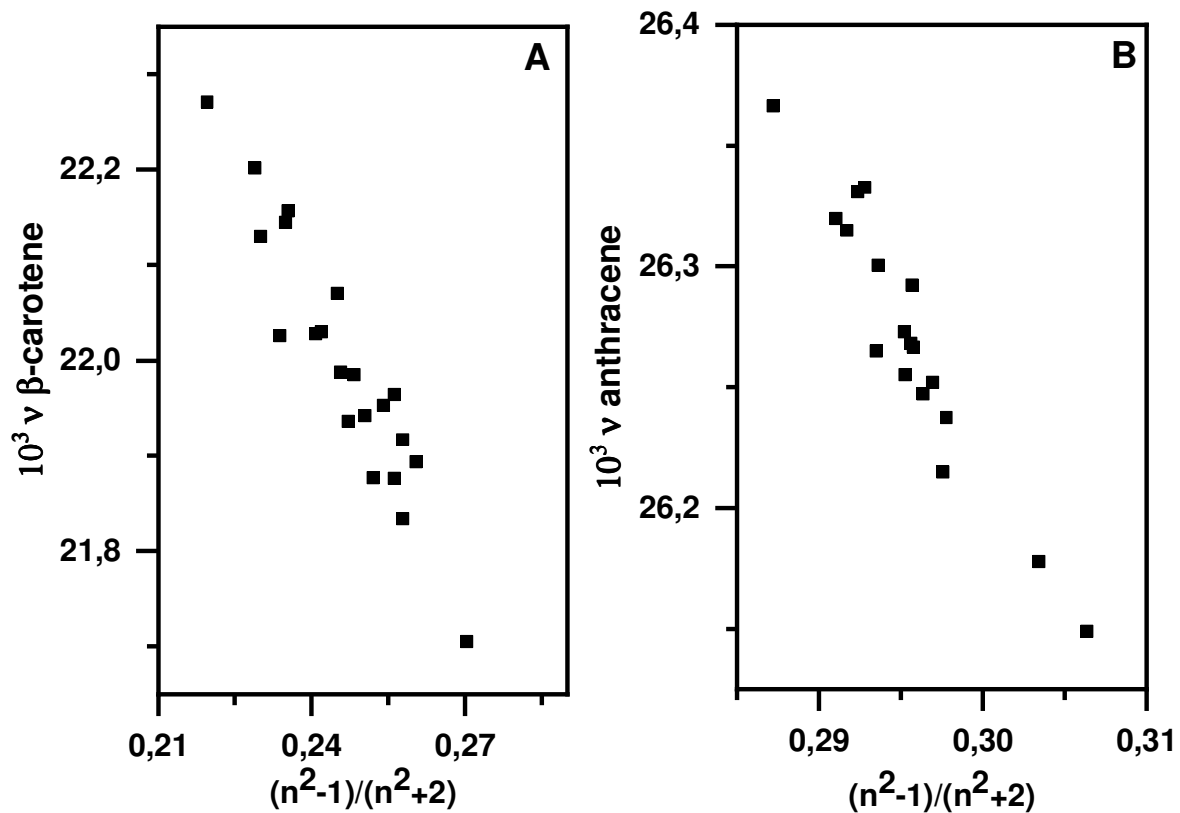

**Figure ESI-1:** Part (A) Relationship between  $\nu$  of  $\beta$ -carotene and the Lorentz-Lorentz refractive index function  $f(n)$  for 21 molecular solvents.<sup>13</sup> Part (B) Relationship between  $\nu$  of anthracene and the Lorentz-Lorentz refractive index function  $f(n)$  for 18 BMs of the present work.

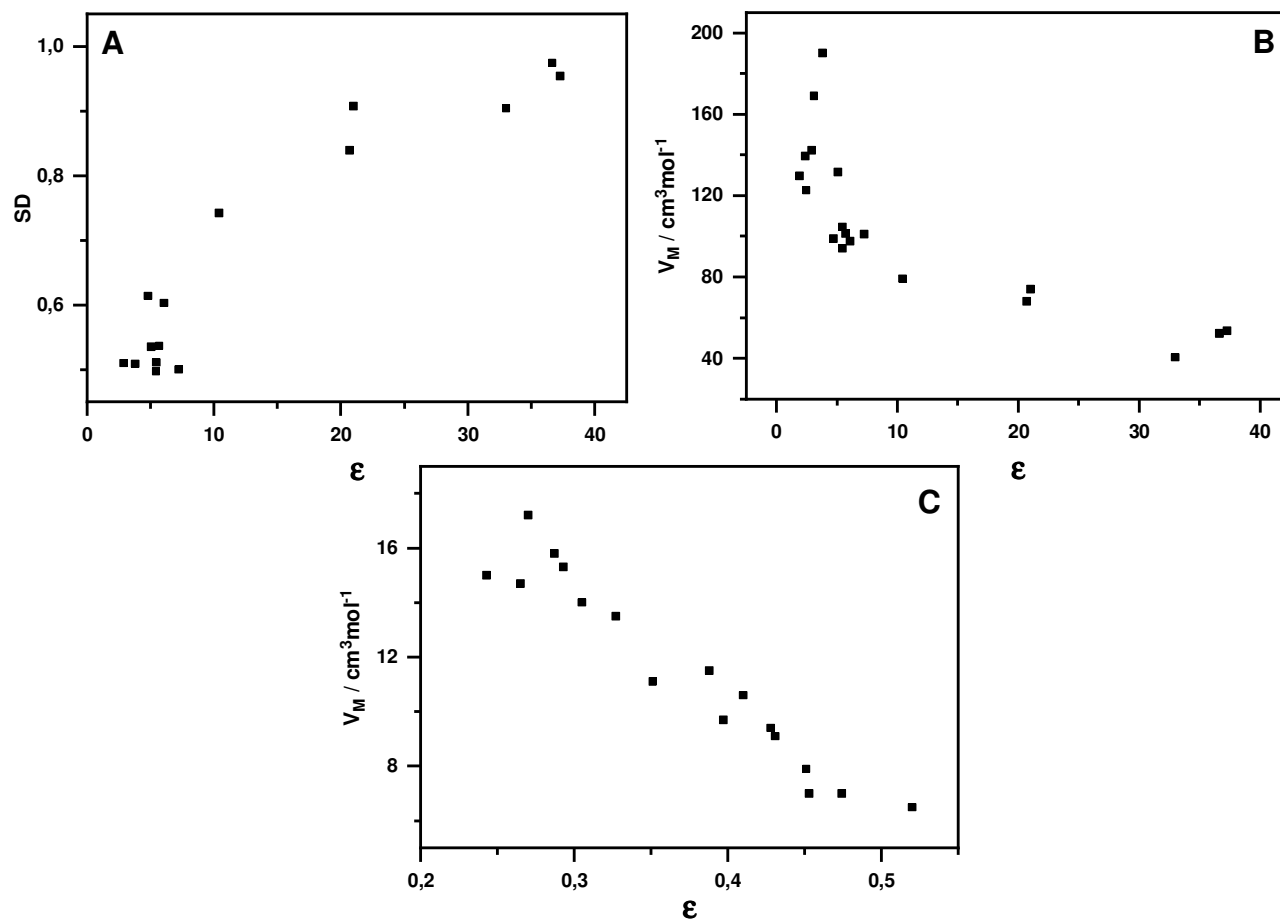

**Figure ESI-2:** Correlation between the values of  $(\epsilon)^{11}$  and  $SD^9$  Catalán (part A) and  $(\epsilon)$  and  $V_M$  (part B) for molecular solvents (**Table ESI-5**). Part (C) Correlation between the values of  $(\epsilon)$  and  $V_M$  of 18  $Li^{13}$  (**Table ESI-6**).

## References

- <sup>1</sup> S. Zhang, N. Sun, X. He, X. Lu, X. Zhang, *J. Phys. Chem. Ref. Data*, 2006, **35** (4), 1475-1571;
- <sup>2</sup> G. R. Vakili-Nezhaad, A. M. Alaisae, M. A. Aljabri, S. S. Albarwani, Z. K. Aljahwari, *Mater. Phys. Mech.*, 2017, **32**, 8-13.
- <sup>3</sup> Molispiration Cheminformatics, <http://www.molispiration.com>, (accessed October 2019).
- <sup>4</sup> C. T. Martins, M. S. Lima, O. A. El Seoud, *J. Org. Chem.*, 2006, **71**(24), 9068-9079.
- <sup>5</sup> C. Reichardt, *Chem. Reviews*, 1994, **94**, 2319-2358.
- <sup>6</sup> M. A. Kessler, O. S. Wolfbeis, *Chem. Phys. Lipids*, 1989, **50** (1), 51-56.

- <sup>7</sup> J. Catalán, C. A. Díaz, *Liebigs Ann.*, 1997, **1997** (9), 1941-1949.
- <sup>8</sup> J. Catalán, C. Díaz, V. López, P. Pérez, J. De Paz, J. Rodríguez, *Liebigs Annales*, 1996, **11**, 1785-1794.
- <sup>9</sup> J. Catalán, *J. Phys. Chem. B*, 2009, **113** (17), 5951-5960.
- <sup>10</sup> P. A. R. Pires, M. Imran, C. Loffredo, P. M. Donate, D. Previdi, O. A. Seoud, *J. Phys. Org. Chem.*, 2013, **26**, 280-285.
- <sup>11</sup> S. Sild, M. Karelson, *J. Chem. Inf. Comput. Sci.*, 2002, **42**, 360-367.
- <sup>12</sup> T. Singh, A. Kumar, *J. Phys. Chem. B*, 2008, **112** (41), 12968-12972.
- <sup>13</sup> C. Loffredo, P. Pires, M. Imran, O. A. El Seoud, *Dyes Pigments*, 2013, **96** (1), 16-24.
